# Supplementary material
Source: PubMed Central journal article supplement (PMC4346138)

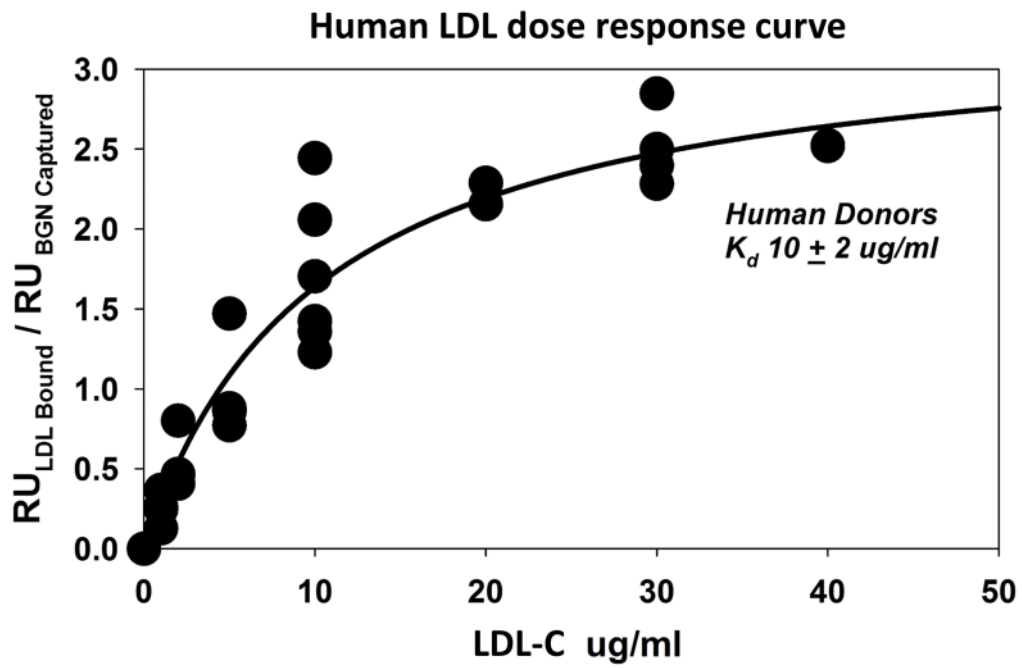

Representative kinetic profile of the LDL-biglycan binding

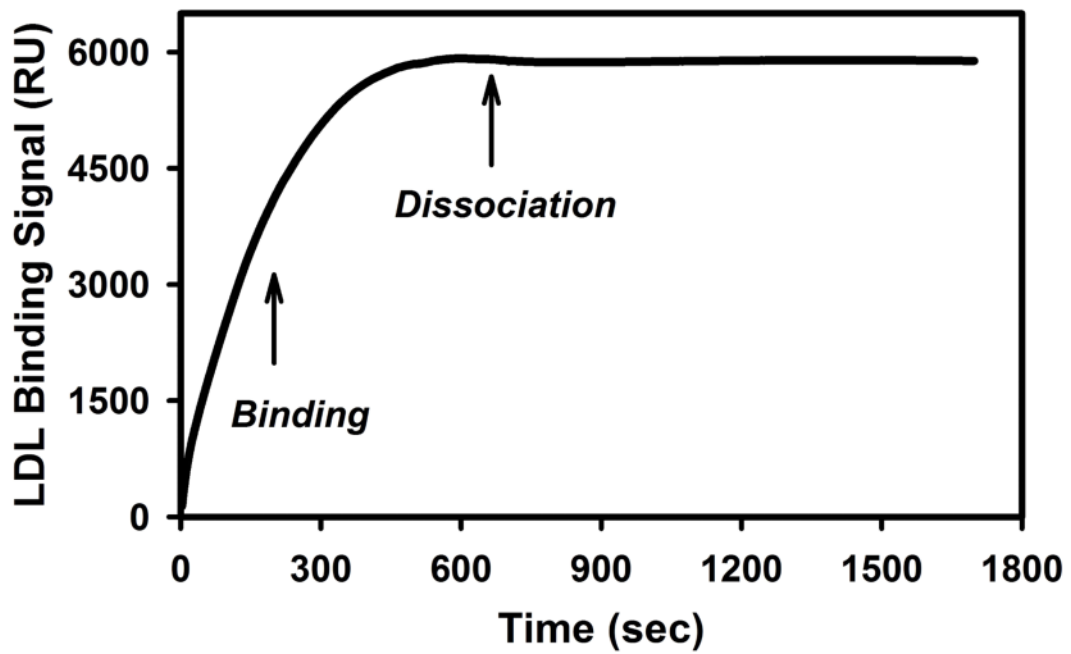

Supplement: NIHMS653652-supplement.pdf [file NIHMS653652-supplement.pdf]
